# Supplementary material for: Cross-linked PS-DVB/Fe3O4 microspheres with quaternary ammonium groups and application in removal of nitrate from water
Source: Royal Society of Chemistry journal article supplement (doi:10.1039/c5ra19642f), 2015-01-01
Supplement: c5ra19642f1.pdf [file c5ra19642f1.pdf]

## ELECTRONIC SUPPLEMENTARY INFORMATION

### Cross-linked PS-DVB/Fe<sub>3</sub>O<sub>4</sub> microspheres with quaternary ammonium groups and application in removal of nitrate from water

Zhenliang Feng<sup>1</sup>, Wenrui Wei<sup>1</sup>, Litong Wang<sup>1</sup>, Ruoyu Hong<sup>1, 2\*</sup>

1. School of Chemical Engineering, Fuzhou University, Fuzhou 350108, China

2. College of Chemistry, Chemical Engineering and Materials Science & Key Laboratory of Organic Synthesis of Jiangsu Province, Soochow University, SIP, Suzhou 215123, China

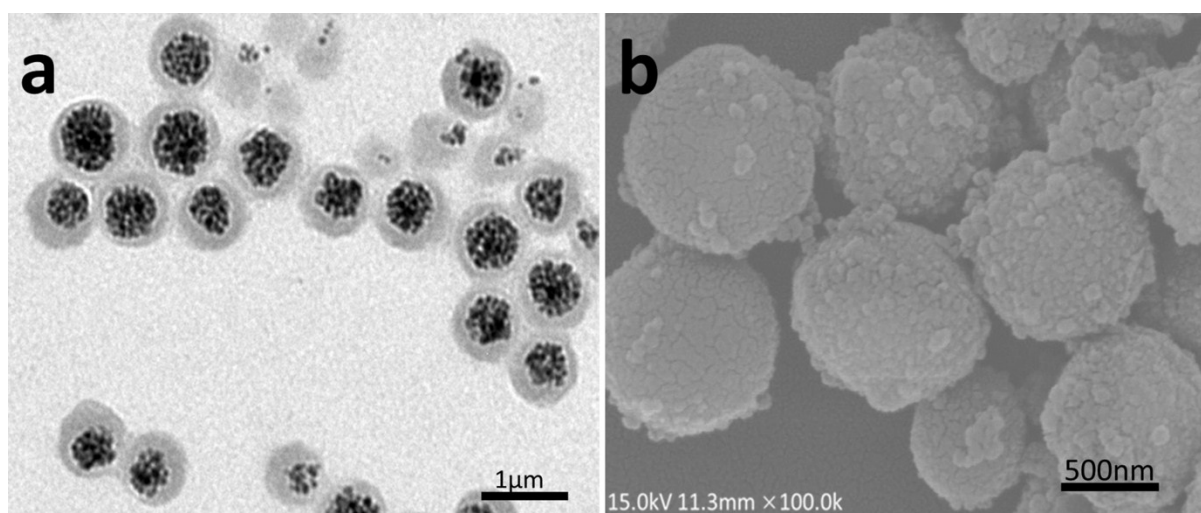

ESI-1#: (a) TEM and (b) SEM images of the PFM-3.

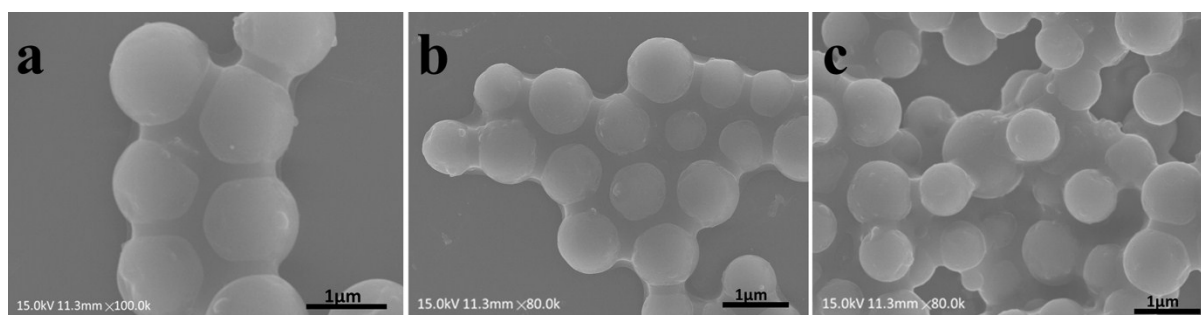

ESI-2#: (a) SEM image of PFM-2, (b) SEM image of PFM-3, (c) SEM image of PFM-4

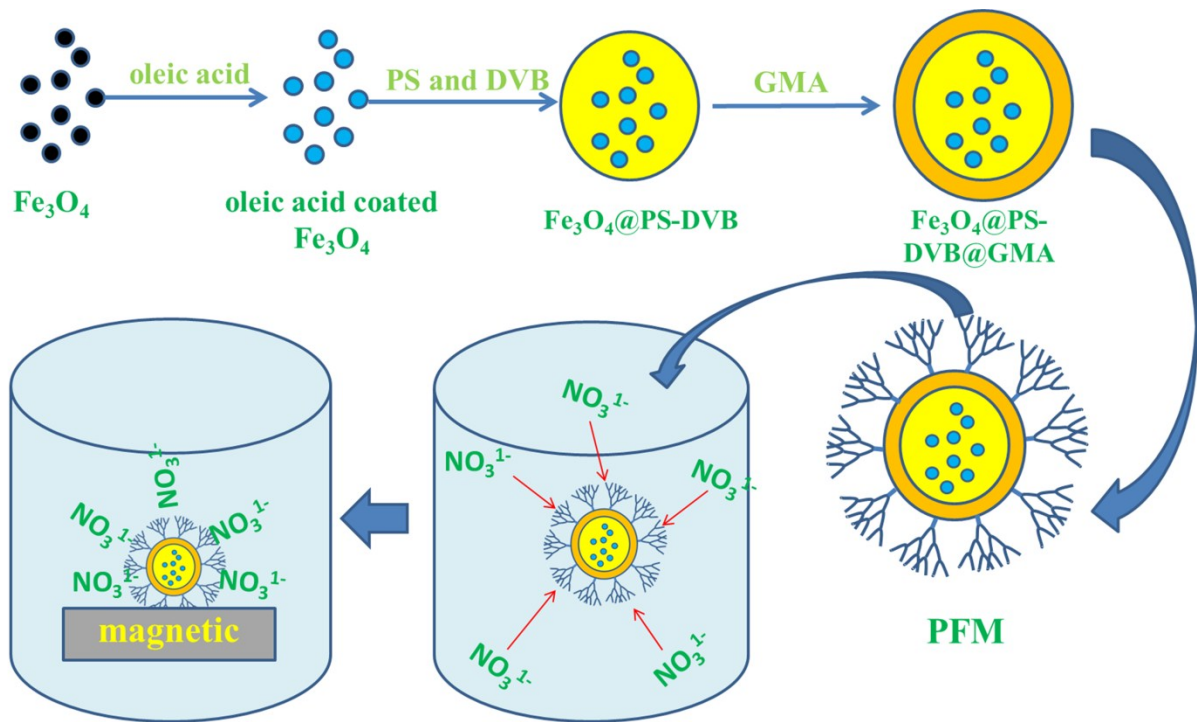

ESI-3#: Schematic of the formation process of PFM.

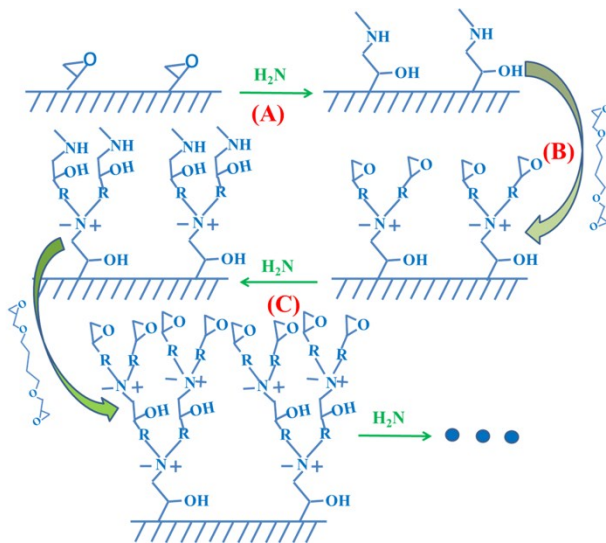

ESI-4#: Overview of PFM functionalization pathways.
